# Supplementary material for: Hearing the light: neural and perceptual encoding of optogenetic stimulation in the central auditory pathway
Source: PubMed Central journal article supplement (PMC4441320; doi:10.1038/srep10319), 2015-05-22
Supplement: srep10319-s1.pdf [file srep10319-s1.pdf]

# Hearing the light: neural and perceptual encoding of optogenetic stimulation in the central auditory pathway

Wei Guo<sup>1,2\*</sup>, Ariel E Hight<sup>1,3</sup>, Jenny X Chen<sup>1,4</sup>, Nathan C Klapoetke<sup>5,6</sup>, Kenneth E Hancock<sup>1,7</sup>,  
Barbara G Shinn-Cunningham<sup>2,8</sup>, Edward S Boyden<sup>5,6</sup>, Daniel J Lee<sup>1,7</sup>, and Daniel B  
Polley<sup>1,2,7\*</sup>

- 1- Eaton-Peabody Laboratories, Massachusetts Eye and Ear Infirmary, Boston MA 02114
- 2- Center for Computational Neuroscience and Neural Technology, Boston University, Boston, Massachusetts 02215
- 3- Program in Speech Hearing Bioscience and Technology, Harvard Medical School (HMS) Boston MA 02115
- 4- New Pathway MD Program, HMS 02115
- 5- The MIT Media Laboratory, Synthetic Neurobiology Group, Massachusetts Institute of Technology (MIT), Cambridge, Massachusetts, USA.
- 6- Department of Biological Engineering, MIT, Cambridge, Massachusetts, USA
- 7- Department of Otology and Laryngology, HMS, Boston MA, 02114
- 8- Department of Biomedical Engineering, Boston University 02215

**\*Contact:**

Wei Guo – [weiguob@bu.edu](mailto:weiguob@bu.edu)

Prof. Daniel Polley - [daniel\\_polley@meei.harvard.edu](mailto:daniel_polley@meei.harvard.edu)

Eaton-Peabody Laboratories, Massachusetts Eye and Ear Infirmary  
243 Charles St. Boston, MA 02114

## Supplementary Materials

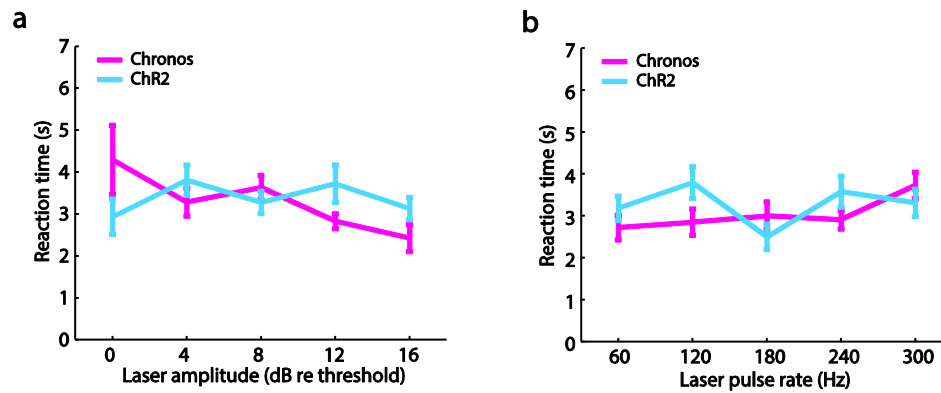

**Fig. S1. Animals' reaction time towards the laser stimulation.** Behavioral crossing latency, rather than crossing probability, is plotted as a function of laser pulse amplitude (a) and rate (b).

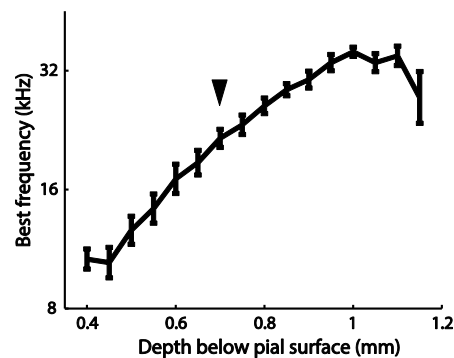

**Fig. S2. The ICc is tonotopically organized along the dorsal-ventral axis.** The best frequency of recorded sites ( $N = 10$  penetrations, 16 sites per penetration) in the ICc are plotted as a function of depth, revealing a tonotopic organization. The arrow indicates the depth of virus injection.

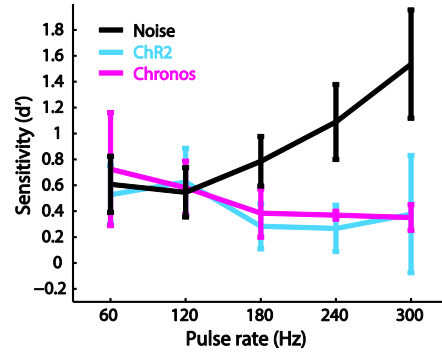

**Fig. S3. The performance of population-based detection matches the performance of single-site-based detection.** The sensitivity indices ( $d'$ ) for stimuli with different pulse rates are measured with a population decoding scheme, where the population  $d'$  is quantified as the highest single-site-based  $d'$  out of all the recorded sites from a given animal.

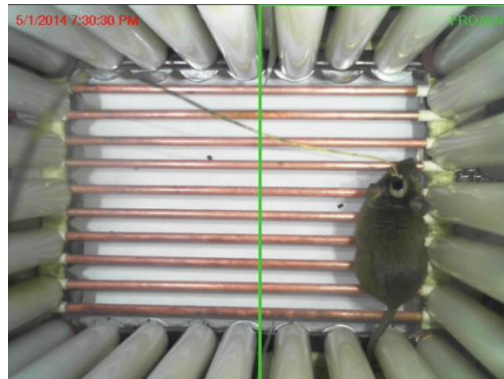

**Movie S1. Animals showed generalized avoidance behavior across stimulus types.** All animals with either Chr2 or Chronos expressed in the ICc would show avoidance behavior towards laser stimulation highly similar to that of sound stimulation.
